# Supplementary material for: Prevalence of Undernutrition, Frailty and Sarcopenia in Community-Dwelling People Aged 50 Years and Above: Systematic Review and Meta-Analysis
Source: MDPI journal article supplement (doi:10.3390/nu14081537), 2022-04-07
Supplement: s1 [file s1]

## Supplementary 1 Joanna Briggs Quality Assessment

**Table S1.** Quality assessment using JBI tool for Cohort studies.

| Author             | Q 1                                                                                                                                                                                                                                                                                                                                    | Q 2 | Q 3 | Q 4 | Q 5 | Q 6 | Q 7 | Q 8 | Q 9 | Q 10 | Q 11 |
|--------------------|----------------------------------------------------------------------------------------------------------------------------------------------------------------------------------------------------------------------------------------------------------------------------------------------------------------------------------------|-----|-----|-----|-----|-----|-----|-----|-----|------|------|
| Carey, 2008 [84]   | N                                                                                                                                                                                                                                                                                                                                      | N/A | U   | N   | N   | N/A | U   | Y   | N/A | N    | Y    |
|                    | Weak, the authors did not mention any criteria for inclusion and exclusion, beside they had their two groups from two different regions with different characteristic. Additionally, they did not stated number of people lost during the follow-up from both groups and they did not conducted any statistical test for data missing. |     |     |     |     |     |     |     |     |      |      |
| Wu, 2018 [73]      | N/A                                                                                                                                                                                                                                                                                                                                    | N/A | Y   | N   | N   | N/A | Y   | N/A | N/A | N/A  | Y    |
|                    | Medium, because the author did not pinpoint the confounding factors nor the test used.                                                                                                                                                                                                                                                 |     |     |     |     |     |     |     |     |      |      |
| Diniz, 2018 [74]   | N/A                                                                                                                                                                                                                                                                                                                                    | N/A | Y   | Y   | Y   | N/A | Y   | Y   | Y   | N    | Y    |
|                    | Medium, because the author did not address strategies to deal with incomplete data after the follow-up, beside, they did not identify the inclusion and exclusion criteria                                                                                                                                                             |     |     |     |     |     |     |     |     |      |      |
| Doi, 2018 [75]     | N/A or N                                                                                                                                                                                                                                                                                                                               | N/A | Y   | U   | U   | N/A | Y   | Y   | Y   | Y    | Y    |
|                    | Medium, the author did not stated nor identify confounder, also, they did not identify the inclusion and exclusion criteria                                                                                                                                                                                                            |     |     |     |     |     |     |     |     |      |      |
| Jung, 2014 [66]    | N/A or N                                                                                                                                                                                                                                                                                                                               | N/A | Y   | Y   | Y   | N/A | Y   | Y   | Y   | Y    | Y    |
|                    | Strong, they only did not identify the inclusion and exclusion criteria                                                                                                                                                                                                                                                                |     |     |     |     |     |     |     |     |      |      |
| Lee, 2018 [67]     | N/A                                                                                                                                                                                                                                                                                                                                    | N/A | Y   | Y   | Y   | N/A | Y   | Y   | U   | Y    | Y    |
|                    | Strong                                                                                                                                                                                                                                                                                                                                 |     |     |     |     |     |     |     |     |      |      |
| Legrand, 2013 [69] | N/A                                                                                                                                                                                                                                                                                                                                    | N/A | Y   | Y   | Y   | N/A | Y   | N/A | N/A | N/A  | Y    |
|                    | Strong                                                                                                                                                                                                                                                                                                                                 |     |     |     |     |     |     |     |     |      |      |
| Masel, 2010 [76]   | N/A                                                                                                                                                                                                                                                                                                                                    | N/A | Y   | N   | N   | N/A | Y   | Y   | Y   | Y    | Y    |
|                    | Medium, the author did not identify confounding factors and did not used any test to deal with them.                                                                                                                                                                                                                                   |     |     |     |     |     |     |     |     |      |      |
| Mitoku, 2014 [85]  | N/A                                                                                                                                                                                                                                                                                                                                    | N/A | N   | U   | Y   | N/A | N   | Y   | Y   | N    | N    |
|                    | Weak, the author did not state the confounder factors and the exposure (frailty)/outcome were based on health insurance not measured during the follow up. Besides, the author did not stated any strategies to deal with loss of follow-up (death). Additionally, the confounder were adjusted without performing regression test.    |     |     |     |     |     |     |     |     |      |      |
| Zheng, 2016 [77]   | N/A                                                                                                                                                                                                                                                                                                                                    | N/A | Y   | U   | Y   | N/A | Y   | Y   | U   | N    | Y    |
|                    | Medium, The author did adjusted the confounding factors without identifying it earlier. Beside they mentioned percentage of lost to follow-up without describing the reasons nor consider it in term of statistical. However, they describe their characteristics.                                                                     |     |     |     |     |     |     |     |     |      |      |
| Yu, 2014 [81]      | N/A                                                                                                                                                                                                                                                                                                                                    | N/A | Y   | U   | Y   | N/A | Y   | Y   | U   | N    | Y    |
|                    | Medium, the authors did adjustment for the confounding factors, but did not identify it as factors. Also, the authors only mentioned the loss of follow-up in figure without any other details nor considering it in statistics.                                                                                                       |     |     |     |     |     |     |     |     |      |      |
| Wu, 2016 [82]      | N/A                                                                                                                                                                                                                                                                                                                                    | N/A | Y   | U   | Y   | N/A | Y   | Y   | N   | N    | Y    |
|                    | Medium, The authors did not identify the confounding clearly but they consider it in statistical analysis. Beside they did not mention any loss/incomplete participants nor utilise strategy to deal with.                                                                                                                             |     |     |     |     |     |     |     |     |      |      |
| Theou, 2017 [68]   | N/A                                                                                                                                                                                                                                                                                                                                    | N/A | Y   | N   | N   | N/A | Y   | Y   | Y   | U    | Y    |
|                    | Strong                                                                                                                                                                                                                                                                                                                                 |     |     |     |     |     |     |     |     |      |      |
| Sim, 2019 [86]     | N/A                                                                                                                                                                                                                                                                                                                                    | N/A | Y   | N   | N   | N/A | Y   | Y   | Y   | U    | N    |
|                    | Weak, the authors used participants recruited from previous studies without pinout the inclusion and exclusion criteria nor mentioning it briefly. In addition, they did not identify confounding factors                                                                                                                              |     |     |     |     |     |     |     |     |      |      |

|                          |                                                                                                                               |     |   |   |   |     |   |    |     |     |   |
|--------------------------|-------------------------------------------------------------------------------------------------------------------------------|-----|---|---|---|-----|---|----|-----|-----|---|
|                          | N/A                                                                                                                           | N/A | Y | N | N | N/A | Y | Y  | N/A | N/A | U |
| Robinson, 2008 [8]       | Weak, the author did not mention the confounder nor strategy to deal with. Beside the authors did not conduct regression test |     |   |   |   |     |   |    |     |     |   |
| Dallmeier, 2020 [80]     | NA                                                                                                                            | N   | Y | Y | Y | NA  | Y | Y  | U   | U   | Y |
|                          | Medium, they have not mentioned how they measured height and weight, type of scale, took the median of three reading.         |     |   |   |   |     |   |    |     |     |   |
| Das, 2020 [78]           | NA                                                                                                                            | Y   | Y | Y | Y | NA  | Y | Y  | N   | N   | Y |
|                          | Medium                                                                                                                        |     |   |   |   |     |   |    |     |     |   |
| Lohman, 2020 [70]        | NA                                                                                                                            | Y   | Y | Y | Y | NA  | Y | Y  | U   | U   | Y |
|                          | Strong                                                                                                                        |     |   |   |   |     |   |    |     |     |   |
| Lorenzo-lobes, 2019 [71] | NA                                                                                                                            | Y   | Y | Y | Y | NA  | Y | Y  | Y   | Y   | Y |
|                          | Strong                                                                                                                        |     |   |   |   |     |   |    |     |     |   |
| Murayama, 2020 [72]      | NA                                                                                                                            | Y   | Y | Y | Y | NA  | Y | NA | NA  | NA  | Y |
|                          | Strong                                                                                                                        |     |   |   |   |     |   |    |     |     |   |
| Nguyen, 2019 [79]        | NA                                                                                                                            | Y   | Y | Y | Y | NA  | Y | U  | U   | N   | Y |
|                          | Medium                                                                                                                        |     |   |   |   |     |   |    |     |     |   |

**Table S2.** Quality assessment using JBI tool for cross-sectional studies.

[illegible]

|                       |                                                                                                                                                      |   |   |   |     |   |   |   |
|-----------------------|------------------------------------------------------------------------------------------------------------------------------------------------------|---|---|---|-----|---|---|---|
| Tramontano, 2017      | Y                                                                                                                                                    | Y | Y | Y | Y   | Y | Y | Y |
|                       | Strong                                                                                                                                               |   |   |   |     |   |   |   |
| Pegorari, 2014        | Y                                                                                                                                                    | Y | Y | Y | U   | U | Y | Y |
|                       | Medium, the authors did not specify the confounding factors and not mentioning strategy used for it.                                                 |   |   |   |     |   |   |   |
| Santos-Eggimann, 2009 | Y                                                                                                                                                    | Y | Y | Y | Y   | Y | Y | Y |
|                       | Strong                                                                                                                                               |   |   |   |     |   |   |   |
| Reis Junior, 2014     | N                                                                                                                                                    | Y | Y | Y | U/Y | Y | Y | Y |
|                       | Strong                                                                                                                                               |   |   |   |     |   |   |   |
| Huang, 2020           | N                                                                                                                                                    | Y | Y | Y | N   | N | Y | N |
|                       | Low, the author did not mention confounder, did not even address it in statistic. Also, the author did not identify inclusion and exclusion criteria |   |   |   |     |   |   |   |
| Rivas-Ruiz, 2019      | Y                                                                                                                                                    | Y | Y | Y | Y   | U | Y | Y |
|                       | Strong                                                                                                                                               |   |   |   |     |   |   |   |
| Xu, 2020              | Y                                                                                                                                                    | Y | Y | Y | N   | Y | Y | Y |
|                       | Strong                                                                                                                                               |   |   |   |     |   |   |   |

Y = Yes, U = Unclear, N = No and N/A = Not applicable.
