# Supplementary material for: Prevalence of Undernutrition, Frailty and Sarcopenia in Community-Dwelling People Aged 50 Years and Above: Systematic Review and Meta-Analysis
Source: MDPI journal article supplement (doi:10.3390/nu14081537), 2022-04-07
Supplement: s1 [file s1]

## Supplementary 1 Search strategy

1. Geriatrics
2. Aged
3. 1 and 2
4. Malnutrition
5. Anorexia
6. Frail Elderly
7. Sarcopenia
8. 4 or 5 or 6 or 7
9. Prevalence
10. Incidence
11. Eating
12. Nutrients
13. Mortality
14. Morbidity
15. 9 or 10 or 11 or 12 or 13 or 14
16. 3 and 8 and 15
17. Limit 16 to humans
