# Supplementary material for: Prevalence of Undernutrition, Frailty and Sarcopenia in Community-Dwelling People Aged 50 Years and Above: Systematic Review and Meta-Analysis
Source: MDPI journal article supplement (doi:10.3390/nu14081537), 2022-04-07

## Supplementary 3 Prevalence Forest Plots

**Figure S1.** (A) Prevalence of undernutrition analysis split by gender in the older people living in the community; (B) Prevalence of undernutrition analysis split by tools in the older people living in the community; (C) Prevalence of frailty analysis split by gender in the older people living in the community (Das include only in male, because all participants were male. There are eight studies not included in the forest plots because they did not report frailty status according to gender (15, 43, 47, 48, 50, 51, 61, 72)); (D) Prevalence of frailty analysis split by tools in the older people living in the community; (E) Prevalence of sarcopenia analysis split by gender in the older people living in the community; (F) Prevalence of sarcopenia analysis split by tools in the older people living in the community; ES = Effect size, CI = Confidence interval, M = Male, F = Female.

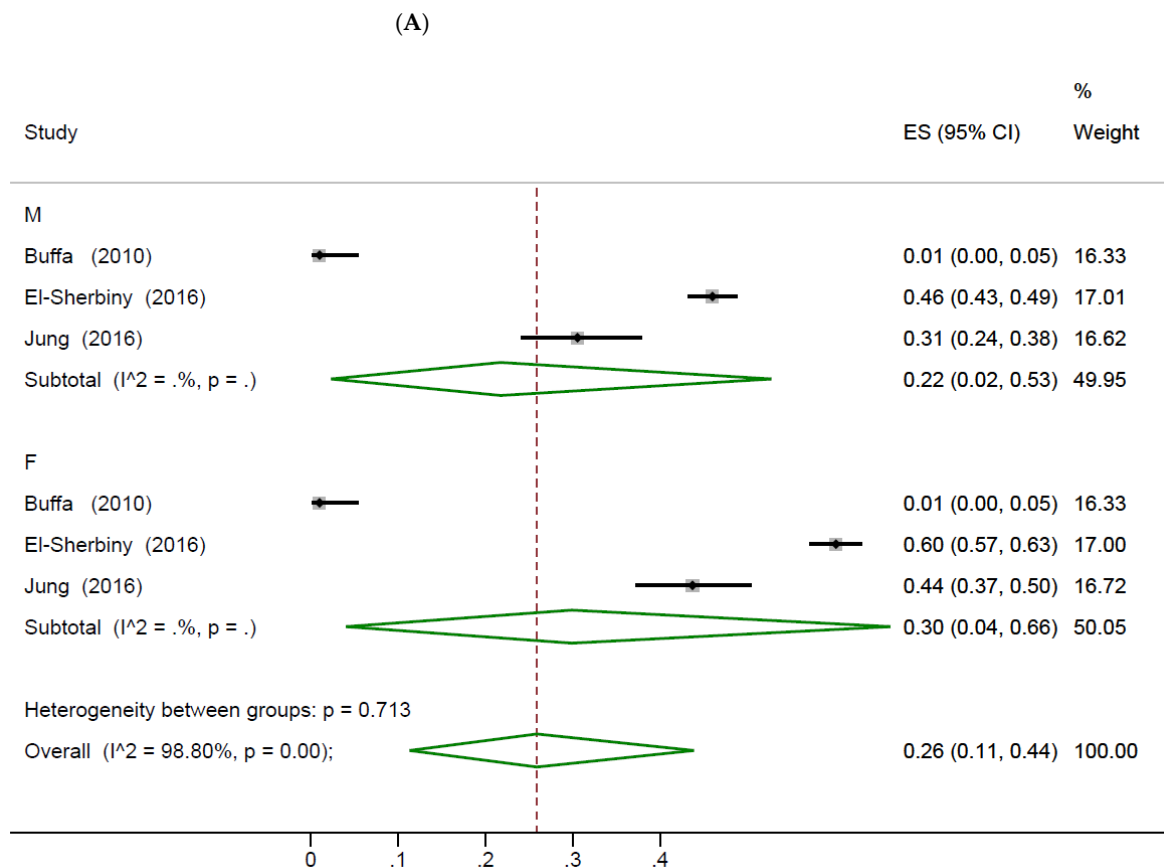

(B)

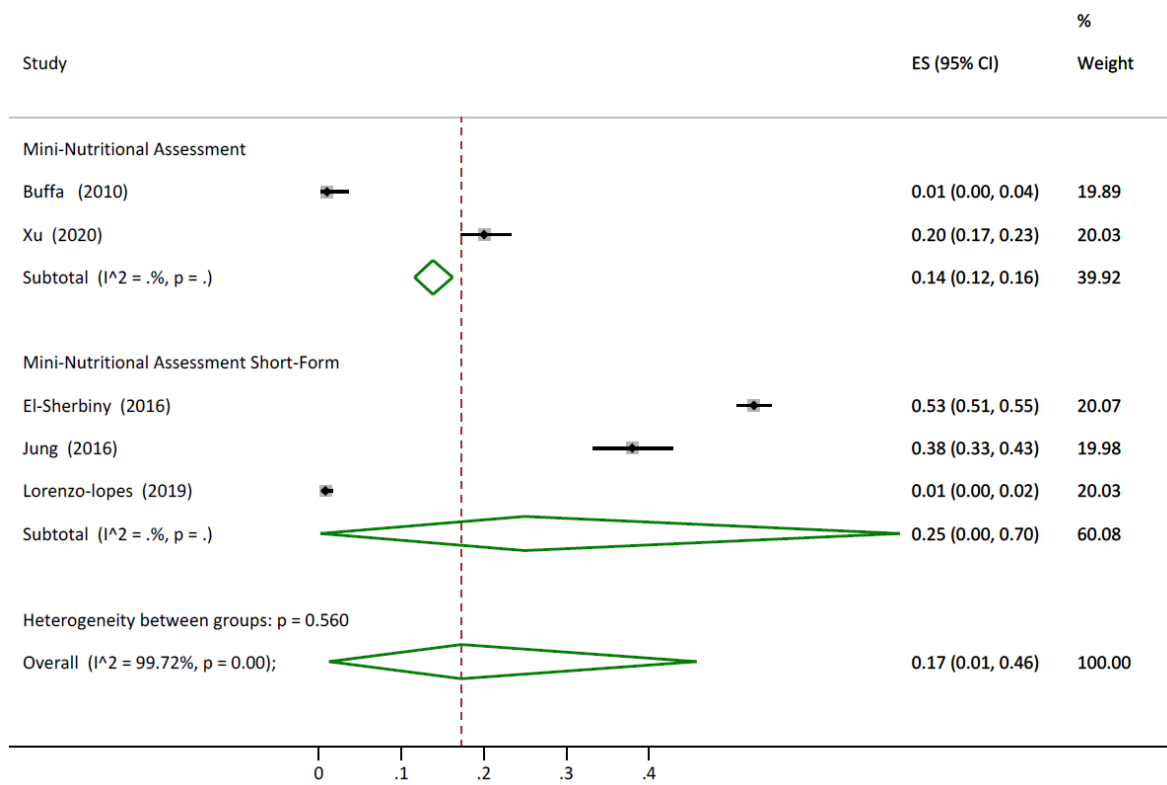

(C)

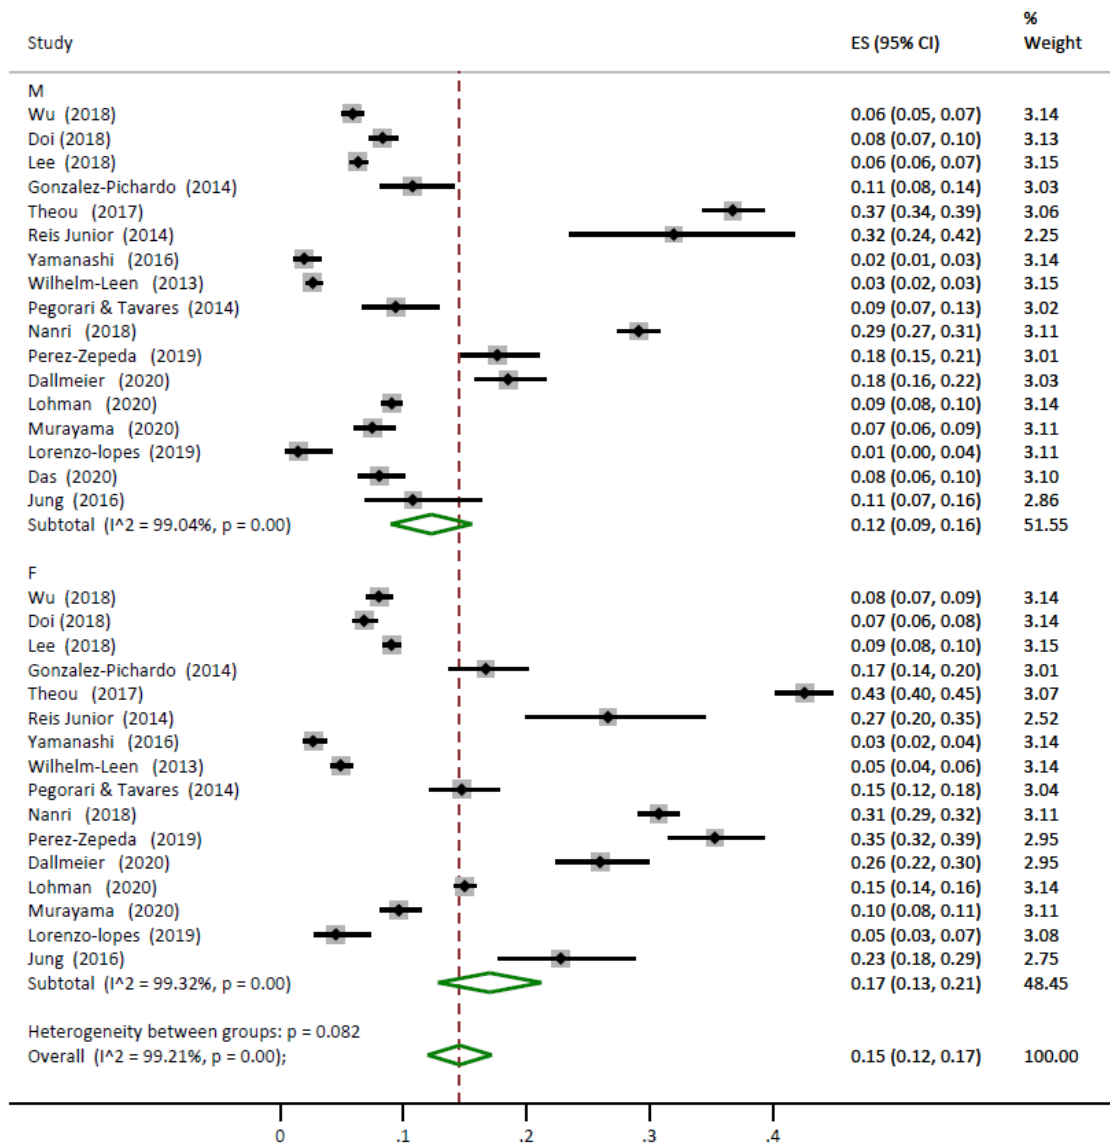

(D)

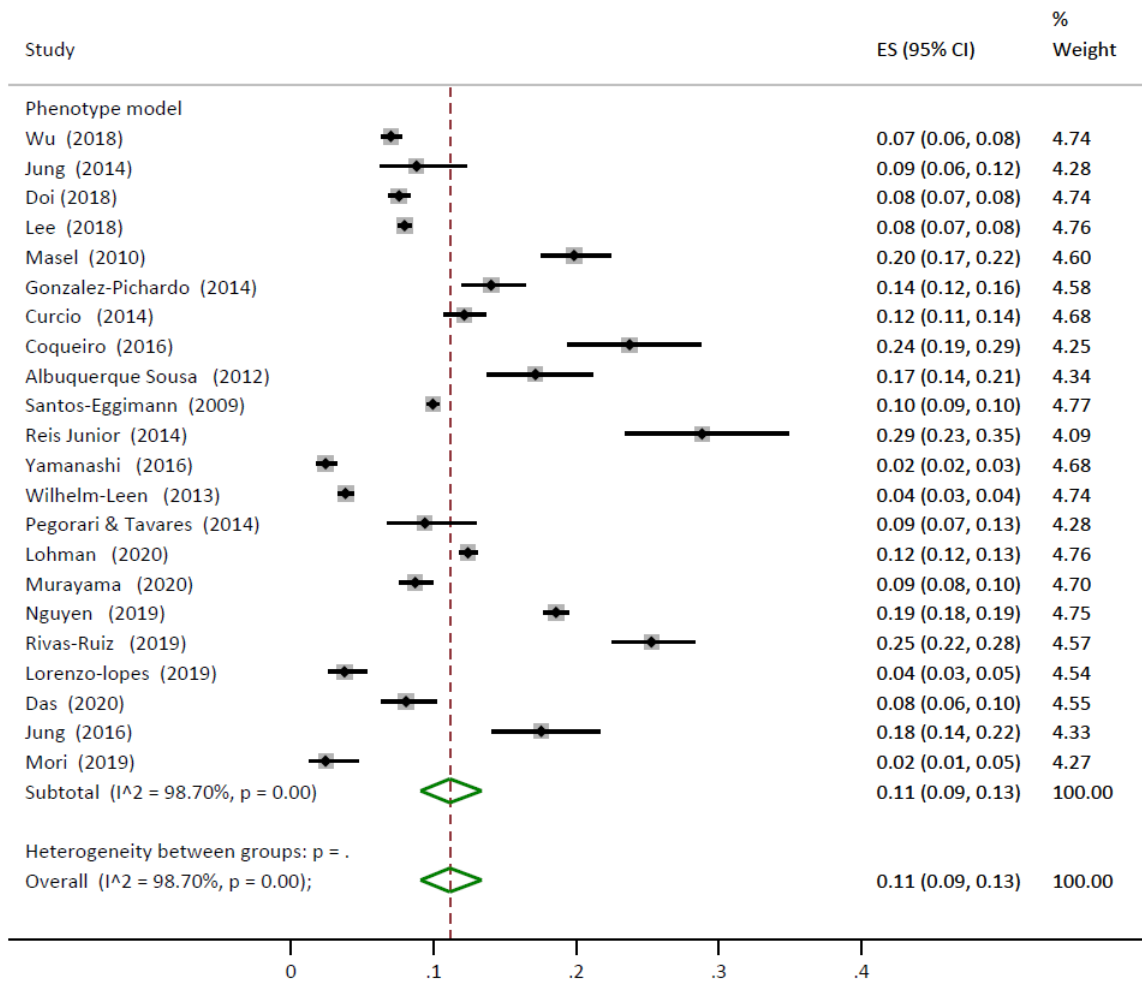

(E)

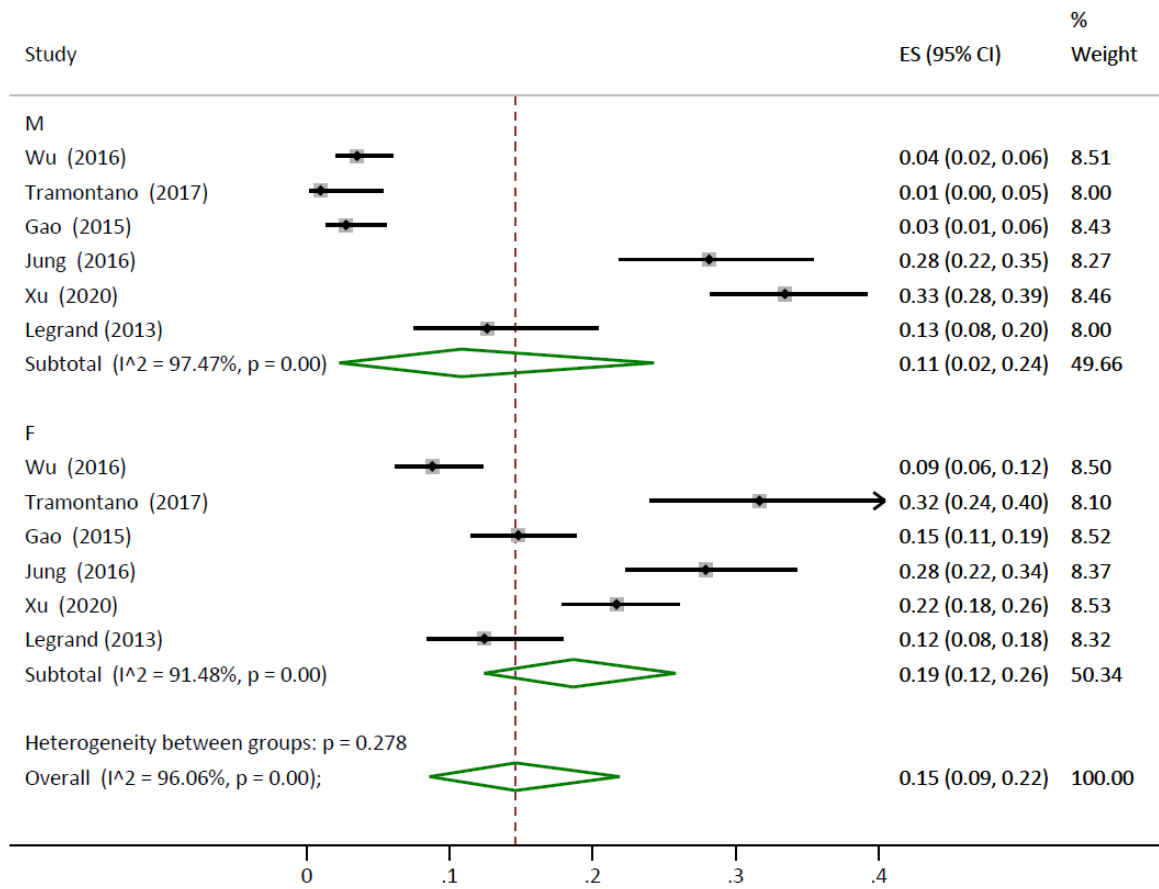

(F)

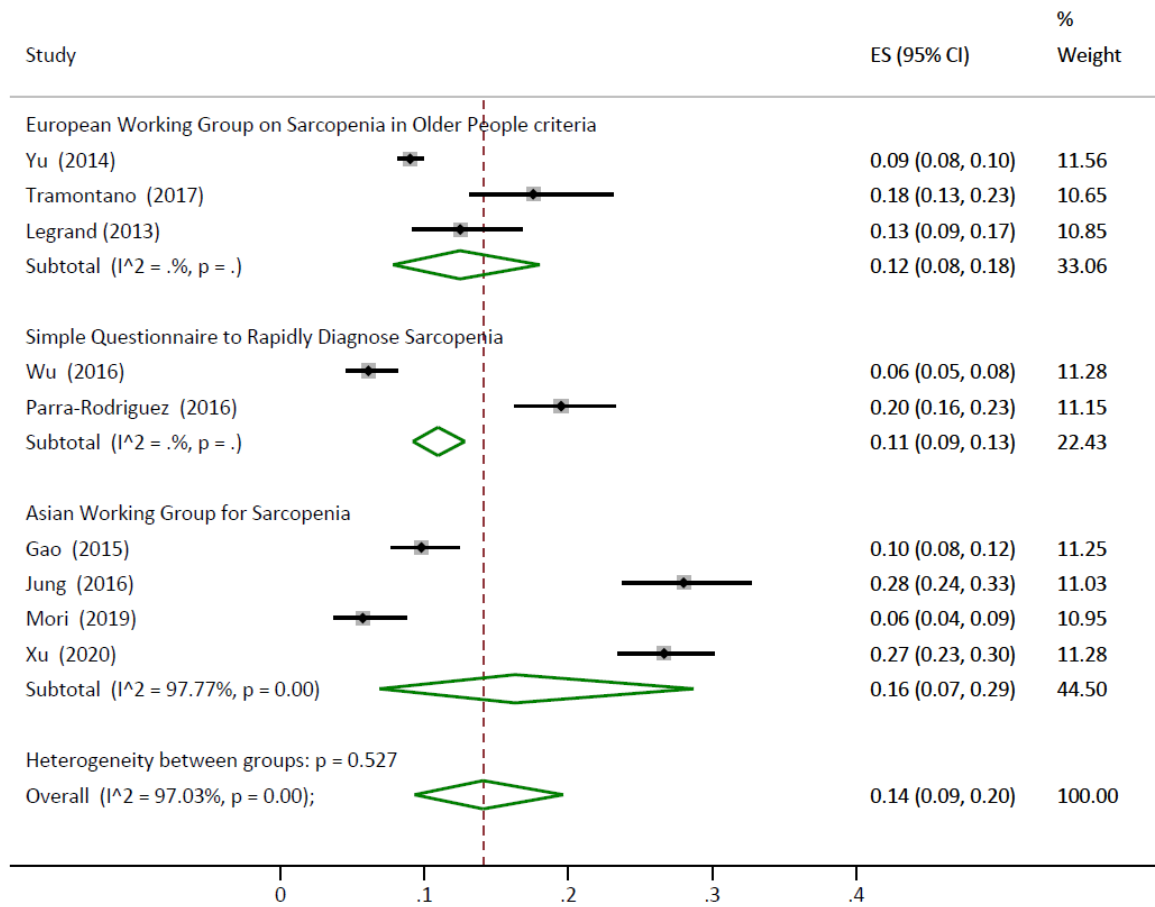

Supplement: s1 [file s1]
