# Supplementary material for: Prevalence of Undernutrition, Frailty and Sarcopenia in Community-Dwelling People Aged 50 Years and Above: Systematic Review and Meta-Analysis
Source: MDPI journal article supplement (doi:10.3390/nu14081537), 2022-04-07
Supplement: s1 [file s1]

## Supplementary 5. Table Studies included in this systematic review presented with female to male ratio.

| Study author                          | Sex ratio | Study author                        | Sex ratio |
|---------------------------------------|-----------|-------------------------------------|-----------|
| (Wu et al., 2017) [73]                | 1         | (Nanri et al., 2018) [60]           | 0.9       |
| (Diniz et al., 2018) [74]             | 0.5       | (Perez-Zepeda et al., 2019) [51]    | 0.9       |
| (Jung et al., 2014) [66]              | 1.1       | (Dallmeier et al., 2020) [80]       | 1.3       |
| (Doi et. Al, 2018) [75]               | 0.9       | (Lohman et al., 2020) [70]          | 0.6       |
| (Lee et al., 2018) [67]               | 0.6       | (Murayama et al., 2020) [72]        | 0.6       |
| (Masel et al., 2010) [76]             | 0.5       | (Nguyen et al., 2019) [79]          | 0.7       |
| (Zheng et al., 2016) [77]             | 0.6       | (Rivas-Ruiz et al., 2019) [57]      | 0.8       |
| (Gonzalez-Pichardo et al, 2013) [47]  | 0.8       | (Lorenzo-lopes et al., 2019) [71]   | 0.6       |
| (Theou et al., 2017) [68]             | 0.8       | (Das et al., 2020)* [78]            |           |
| (Curcio et al., 2017) [48]            | 0.9       | (Buffa et al., 2010) [65]           | 1         |
| (Coqueiro et al., 2017) [49]          | 0.9       | (El-Sherbiny et al., 2016) [63]     | 1.1       |
| (Albuquerque Sousa et al., 2012) [64] | 0.6       | (Yu et al., 2014) [81]              | 1         |
| (Santos-Eggimann et al., 2009)* [15]  |           | (Wu et al., 2016) [82]              | 1         |
| (Reis Junior et al., 2014) [55]       | 0.6       | (Tramontano et al., 2017) [54]      | 0.8       |
| (Yamanashi et al, 2016) [52]          | 0.5       | (Gao et al., 2015) [62]             | 0.7       |
| (Wilhelm-Leen et al, 2013) [53]       | 0.9       | (Jung et al., 2016) [61]            | 0.7       |
| (Pegorari & Tavares, 2014) [58]       | 0.5       | (Parra-Rodriguez et al., 2016) [59] | 0.2       |
| (Mori et al., 2019) [50]              | 0.3       | (Xu et al., 2020) [56]              | 0.7       |

\*Santos study did not have information about the numbers of females and males. Das study had males only.
