# Supplementary material for: Prevalence of Undernutrition, Frailty and Sarcopenia in Community-Dwelling People Aged 50 Years and Above: Systematic Review and Meta-Analysis
Source: Nutrients. 2022 Apr 7;14(8):1537. doi: 10.3390/nu14081537 (PMC9032775; doi:10.3390/nu14081537)
Supplement: Supplementary file 1 [file nutrients-14-01537-s001.zip]

Archive with 5 entries (5 files):
- Supplementary 1 Search strategy.pdf
- Supplementary 2 Joanna Briggs Quality Assessment.pdf
- Supplementary 3 Prevalence Forest Plots.pdf
- Supplementary 4 Study characteristics.pdf
- Supplementary 5 Studies included in this systematic review presented with female to male ratio.pdf
